# Supplementary material
Source: HighWire-hosted journal article supplement (https://www.qdcxjkg.com/highwire/filestream/114175/field_highwire_adjunct_files/0/online_supplement.pdf)
Supplement: online_supplement.pdf [file online_supplement.pdf]

**Online supplement:**

**Prospective cohort. Asthma control and exacerbation rate in asthmatics classified according to blood and sputum eosinophil count.**

|                                                         | <b>Blood eos &lt;400/<math>\mu</math>l<br/>Sputum eos &lt;3%</b> | <b>Blood eos &lt;400/<math>\mu</math>l<br/>Sputum eos <math>\geq</math>3%</b> | <b>Blood eos <math>\geq</math>400/<math>\mu</math>l<br/>Sputum eos &lt;3%</b> | <b>Blood eos <math>\geq</math>400/<math>\mu</math>l<br/>Sputum eos <math>\geq</math>3%</b> |
|---------------------------------------------------------|------------------------------------------------------------------|-------------------------------------------------------------------------------|-------------------------------------------------------------------------------|--------------------------------------------------------------------------------------------|
| <b>Exacerbations<br/>(/patient/yr)<br/>Previous yr</b>  | 0.77 $\pm$ 2.55<br>(n=111)                                       | 0.92 $\pm$ 1.40*<br>(n=76)                                                    | 0.38 $\pm$ 0.74<br>(n=9)                                                      | 1.11 $\pm$ 1.65*<br>(n=41)                                                                 |
| <b>Exacerbations<br/>(/patient/yr)<br/>Following yr</b> | 0.39 $\pm$ 1.36 <sup>®®</sup>                                    | 0.52 $\pm$ 0.89* <sup>®®</sup>                                                | 0.66 $\pm$ 1.11                                                               | 0.73 $\pm$ 1.10                                                                            |
| <b>ACQ</b>                                              | 1.79 $\pm$ 1.12                                                  | 2.11 $\pm$ 1.28                                                               | 2.16 $\pm$ 1.20                                                               | 2.23 $\pm$ 1.40*                                                                           |

\*p<0.05 for the comparison between the four groups. Non eosinophilic asthma is used as a comparator.

<sup>®®</sup>p<0.01 for the comparison between exacerbations in the previous and following year in each subgroup.
